# Supplementary material
Source: MDPI journal article supplement (https://www.mdpi.com/2079-6412/13/7/1250)
Supplement: s1 [file s1]

# Synthesis of $\text{CoFe}_2\text{O}_4$ through Wet Ferritization Method Using an Aqueous Extract of Eucalyptus Leaves

Dana Gingasu <sup>1,\*</sup>, Daniela C. Culita <sup>1</sup>, Jose Maria Calderon Moreno <sup>1</sup>, Gabriela Marinescu <sup>1</sup>, Cristina Bartha <sup>2,\*</sup>, Ovidiu Oprea <sup>3</sup>, Silviu Preda <sup>1</sup>, Mariana Carmen Chifiriuc <sup>4,5,6</sup> and Marcela Popa <sup>5</sup>

<sup>1</sup> Ilie Murgulescu Institute of Physical Chemistry, Romanian Academy, 202 Splaiul Independentei, 060021 Bucharest, Romania

<sup>2</sup> National Institute of Materials Physics, 405A Atomistilor Street, P. O. Box Mg-7, 077125 Magurele, Romania

<sup>3</sup> Faculty of Chemical Engineering and Biotechnologies, University Politehnica of Bucharest, 1-7 Polizu Street, 011061 Bucharest, Romania

<sup>4</sup> Microbiology Department, Faculty of Biology, University of Bucharest, 91-95 Splaiul Independentei, 050095 Bucharest, Romania

<sup>5</sup> ICUB, University of Bucharest, 91-95 Splaiul Independentei, 050095 Bucharest, Romania

<sup>6</sup> Romanian Academy, 125 Calea Victoriei, 010071 Bucharest, Romania

\* Correspondence: d\_gingasu@yahoo.com or dgingasu@icf.ro (D.G.); cristina.bartha@infim.ro (C.B.)

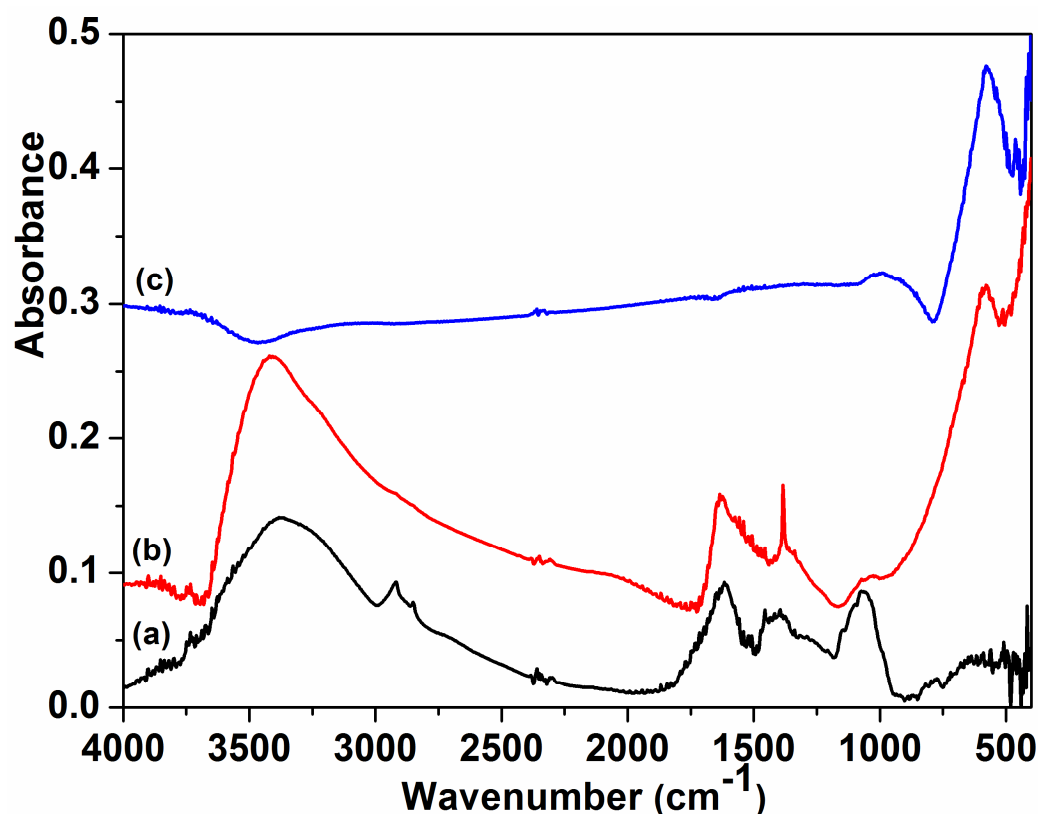

**Figure S1.** FTIR spectra of the samples: (a) dry eucalyptus leaves extract, (b) N sample, (c) N-800 sample.

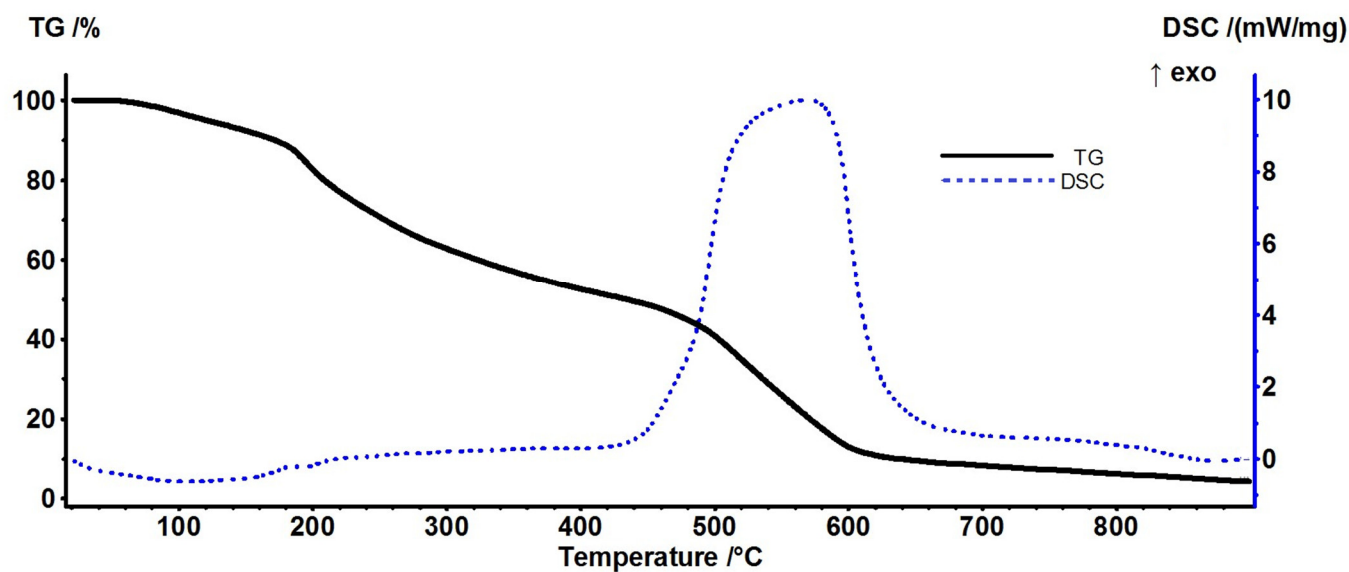

Figure S2. Thermal analysis of dry eucalyptus extract.

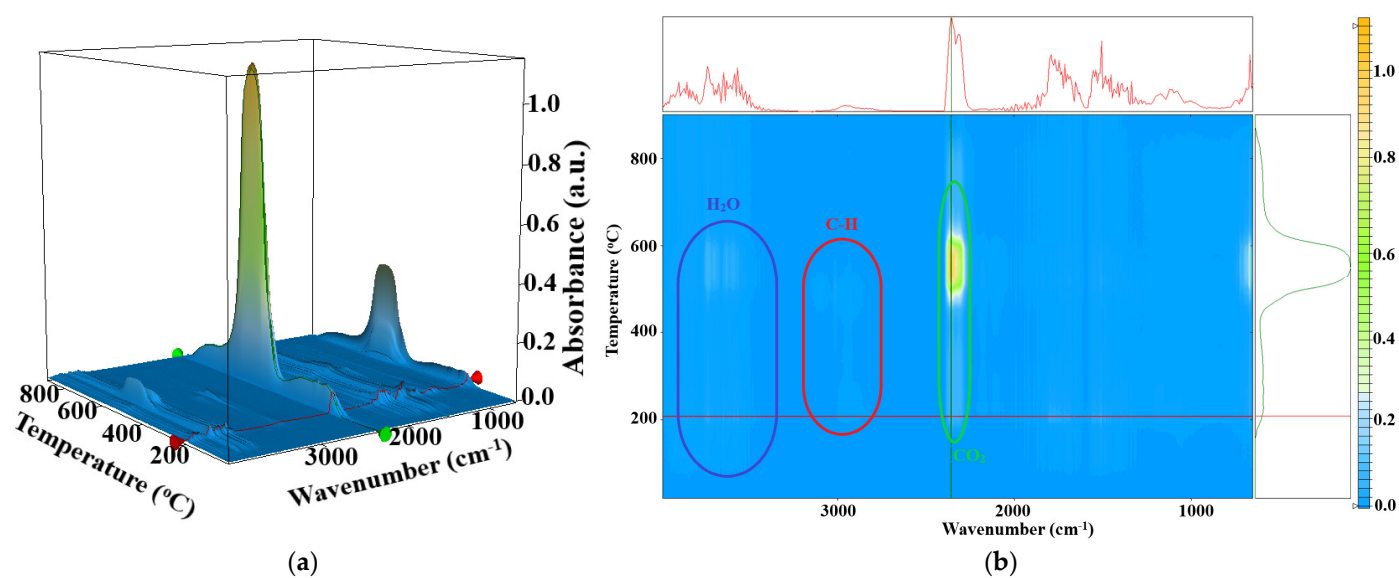

Figure S3. The FTIR 3D diagram for the evolved gases from thermal analysis of eucalyptus extract (a) and its projection in the wavenumber/temperature plane, with indication of temperature intervals in which H<sub>2</sub>O, CO<sub>2</sub> and hydrocarbon fragments are identified (b).
